# Supplementary material for: Improving the diagnosis of active tuberculosis: a novel approach using magnetic particle-based chemiluminescence LAM assay
Source: Springer Nature journal article supplement (doi:10.1186/s12890-024-02893-2), 2024-02-27
Supplement: MOESM1 [file 26791082]

Table S1: Sample Information for Calculating the Cutoff of LAM-CLIA Assay

This table presents the sample information for calculating the cutoff of the LAM-CLIA assay, including the number of patients, their sex, age, clinical diagnosis result, and LAM test results. Clinical diagnosis result refers to the patient's confirmed or suspected diagnosis, while LAM test results

| NO.  | Sex    | Age | Clinical diagnosis | LAM test (RLUs) | LAM test(S/C O) | LAM test(pg/ml) | Gene Xpert MTB/RI F | sputum smear | sputum culture |
|------|--------|-----|--------------------|-----------------|-----------------|-----------------|---------------------|--------------|----------------|
| H001 | Male   | 33  | Healthy            | 824             | 0.76            | 0.01            | /                   | /            | /              |
| H002 | Male   | 40  | Healthy            | 858             | 0.79            | 0.15            | /                   | /            | /              |
| H003 | Male   | 89  | Healthy            | 866             | 0.80            | 0.18            | /                   | /            | /              |
| H004 | Female | 32  | Healthy            | 877             | 0.81            | 0.22            | /                   | /            | /              |
| H005 | Female | 56  | Healthy            | 866             | 0.80            | 0.18            | /                   | /            | /              |
| H006 | Female | 39  | Healthy            | 873             | 0.81            | 0.20            | /                   | /            | /              |
| H007 | Female | 56  | Healthy            | 876             | 0.81            | 0.22            | /                   | /            | /              |
| H008 | Female | 37  | Healthy            | 866             | 0.80            | 0.18            | /                   | /            | /              |
| H009 | Male   | 71  | Healthy            | 784             | 0.72            | 0.00            | /                   | /            | /              |
| H010 | Female | 74  | Healthy            | 695             | 0.64            | 0.00            | /                   | /            | /              |
| H011 | Male   | 71  | Healthy            | 834             | 0.77            | 0.05            | /                   | /            | /              |
| H012 | Female | 33  | Healthy            | 839             | 0.77            | 0.07            | /                   | /            | /              |
| H013 | Female | 23  | Healthy            | 720             | 0.66            | 0.00            | /                   | /            | /              |
| H014 | Male   | 18  | Healthy            | 840             | 0.78            | 0.07            | /                   | /            | /              |
| H015 | Male   | 56  | Healthy            | 866             | 0.80            | 0.18            | /                   | /            | /              |
| H016 | Male   | 69  | Healthy            | 796             | 0.73            | 0.00            | /                   | /            | /              |
| H017 | Male   | 87  | Healthy            | 721             | 0.67            | 0.00            | /                   | /            | /              |
| H018 | Male   | 66  | Healthy            | 786             | 0.73            | 0.00            | /                   | /            | /              |
| H019 | Male   | 25  | Healthy            | 775             | 0.71            | 0.00            | /                   | /            | /              |
| H020 | Male   | 47  | Healthy            | 719             | 0.66            | 0.00            | /                   | /            | /              |
| H021 | Female | 52  | Healthy            | 875             | 0.81            | 0.21            | /                   | /            | /              |
| H022 | Female | 61  | Healthy            | 669             | 0.62            | 0.00            | /                   | /            | /              |
| H023 | Male   | 46  | Healthy            | 735             | 0.68            | 0.00            | /                   | /            | /              |
| H024 | Female | 39  | Healthy            | 793             | 0.73            | 0.00            | /                   | /            | /              |
| H025 | Female | 88  | Healthy            | 725             | 0.67            | 0.00            | /                   | /            | /              |
| H026 | Male   | 76  | Healthy            | 685             | 0.63            | 0.00            | /                   | /            | /              |
| H027 | Male   | 25  | Healthy            | 785             | 0.72            | 0.00            | /                   | /            | /              |
| H028 | Male   | 75  | Healthy            | 751             | 0.69            | 0.00            | /                   | /            | /              |
| H029 | Male   | 80  | Healthy            | 714             | 0.66            | 0.00            | /                   | /            | /              |
| H030 | Male   | 19  | Healthy            | 660             | 0.61            | 0.00            | /                   | /            | /              |
| H031 | Male   | 25  | Healthy            | 935             | 0.86            | 0.45            | /                   | /            | /              |
| H032 | Male   | 76  | Healthy            | 911             | 0.84            | 0.36            | /                   | /            | /              |
| H033 | Male   | 75  | Healthy            | 841             | 0.78            | 0.08            | /                   | /            | /              |
| H034 | Male   | 80  | Healthy            | 849             | 0.78            | 0.11            | /                   | /            | /              |
| H035 | Male   | 67  | Healthy            | 889             | 0.82            | 0.27            | /                   | /            | /              |
| H036 | Male   | 25  | Healthy            | 867             | 0.80            | 0.18            | /                   | /            | /              |
| H037 | Female | 24  | Healthy            | 701             | 0.65            | 0.00            | /                   | /            | /              |
| H038 | Male   | 80  | Healthy            | 996             | 0.92            | 0.69            | /                   | /            | /              |
| H039 | Male   | 54  | Healthy            | 917             | 0.85            | 0.38            | /                   | /            | /              |
| H040 | Male   | 75  | Healthy            | 1035            | 0.95            | 0.85            | /                   | /            | /              |
| H041 | Male   | 70  | Healthy            | 900             | 0.83            | 0.31            | /                   | /            | /              |

|      |        |    |         |        |        |         |          |          |          |
|------|--------|----|---------|--------|--------|---------|----------|----------|----------|
| H042 | Male   | 43 | Healthy | 767    | 0.71   | 0.00    | /        | /        | /        |
| H043 | Male   | 54 | Healthy | 890    | 0.82   | 0.27    | /        | /        | /        |
| H044 | Male   | 54 | Healthy | 692    | 0.64   | 0.00    | /        | /        | /        |
| H045 | Female | 70 | Healthy | 652    | 0.60   | 0.00    | /        | /        | /        |
| H046 | Male   | 88 | Healthy | 747    | 0.69   | 0.00    | /        | /        | /        |
| H047 | Male   | 67 | Healthy | 1028   | 0.95   | 0.82    | /        | /        | /        |
| H048 | Female | 70 | Healthy | 818    | 0.75   | 0.00    | /        | /        | /        |
| H049 | Female | 61 | Healthy | 663    | 0.61   | 0.00    | /        | /        | /        |
| H050 | Male   | 70 | Healthy | 862    | 0.79   | 0.16    | /        | /        | /        |
| H051 | Male   | 46 | Healthy | 621    | 0.57   | 0.00    | /        | /        | /        |
| H052 | Male   | 54 | Healthy | 686    | 0.63   | 0.00    | /        | /        | /        |
| H053 | Male   | 88 | Healthy | 738    | 0.68   | 0.00    | /        | /        | /        |
| H054 | Male   | 43 | Healthy | 768    | 0.71   | 0.00    | /        | /        | /        |
| H055 | Female | 39 | Healthy | 798    | 0.74   | 0.00    | /        | /        | /        |
| H056 | Male   | 53 | Healthy | 700    | 0.65   | 0.00    | /        | /        | /        |
| H057 | Female | 19 | Healthy | 654    | 0.60   | 0.00    | /        | /        | /        |
| H058 | Male   | 57 | Healthy | 828    | 0.76   | 0.02    | /        | /        | /        |
| H059 | Male   | 49 | Healthy | 733    | 0.68   | 0.00    | /        | /        | /        |
| H060 | Female | 38 | Healthy | 955    | 0.88   | 0.53    | /        | /        | /        |
| H061 | Male   | 10 | Healthy | 881    | 0.81   | 0.24    | /        | /        | /        |
| H062 | Male   | 28 | Healthy | 760    | 0.70   | 0.00    | /        | /        | /        |
| H063 | Male   | 33 | Healthy | 679    | 0.63   | 0.00    | /        | /        | /        |
| H064 | Male   | 14 | Healthy | 910    | 0.84   | 0.35    | /        | /        | /        |
| H065 | Male   | 32 | Healthy | 771    | 0.71   | 0.00    | /        | /        | /        |
| P001 | Male   | 79 | TB      | 4073   | 3.76   | 12.92   | Negative | /        | Negative |
| P002 | Female | 78 | TB      | 893    | 0.82   | 0.28    | Postive  | Postive  | Postive  |
| P003 | Male   | 59 | TB      | 2955   | 2.73   | 8.48    | Negative | Postive  | /        |
| P004 | Male   | 70 | TB      | 715    | 0.66   | 0.00    | Postive  | Negative | /        |
| P005 | Male   | 50 | TB      | 724    | 0.67   | 0.00    | /        | Negative | /        |
| P006 | Male   | 34 | TB      | 990    | 0.91   | 0.67    | Negative | Negative | Postive  |
| P007 | Male   | 28 | TB      | 945    | 0.87   | 0.49    | Postive  | Negative | /        |
| P008 | Male   | 61 | TB      | 1154   | 1.06   | 1.32    | Negative | Postive  | Postive  |
| P009 | Female | 83 | TB      | 1551   | 1.43   | 2.90    | /        | Negative | /        |
| P010 | Male   | 68 | TB      | 2079   | 1.92   | 4.99    | /        | Negative | /        |
| P011 | Male   | 56 | TB      | 20033  | 18.48  | 76.33   | Negative | /        | Negative |
| P012 | Male   | 74 | TB      | 656    | 0.61   | 0.00    | Postive  | /        | Negative |
| P013 | Male   | 55 | TB      | 812    | 0.75   | 0.00    | Negative | Negative | /        |
| P014 | Male   | 56 | TB      | 35244  | 32.51  | 136.76  | Negative | /        | /        |
| P015 | Male   | 56 | TB      | 2549   | 2.35   | 6.86    | Postive  | Negative | Negative |
| P016 | Male   | 42 | TB      | 362743 | 334.63 | 1437.91 | /        | Negative | /        |
| P017 | Male   | 53 | TB      | 672    | 0.62   | 0.00    | Negative | Negative | /        |
| P018 | Male   | 53 | TB      | 940    | 0.87   | 0.47    | Postive  | Negative | Negative |
| P019 | Male   | 58 | TB      | 1090   | 1.01   | 1.07    | Negative | Postive  | /        |
| P020 | Male   | 73 | TB      | 1113   | 1.03   | 1.16    | Postive  | Negative | /        |
| P021 | Male   | 72 | TB      | 631    | 0.58   | 0.00    | Postive  | Postive  | /        |
| P022 | Male   | 20 | TB      | 1486   | 1.37   | 2.64    | Postive  | Negative | /        |
| P023 | Male   | 32 | TB      | 4510   | 4.16   | 14.65   | /        | /        | Negative |
| P024 | Male   | 71 | TB      | 801    | 0.74   | 0.00    | Negative | /        | /        |
| P025 | Male   | 59 | TB      | 689    | 0.64   | 0.00    | Postive  | Negative | Postive  |
| P026 | Female | 49 | TB      | 1274   | 1.18   | 1.80    | Postive  | /        | /        |
| P027 | Female | 57 | TB      | 1546   | 1.43   | 2.88    | Negative | /        | /        |
| P028 | Male   | 49 | TB      | 1198   | 1.10   | 1.49    | Postive  | Negative | Negative |
| P029 | Male   | 54 | TB      | 687    | 0.63   | 0.00    | Postive  | Postive  | /        |

|      |        |    |    |      |      |       |          |          |          |
|------|--------|----|----|------|------|-------|----------|----------|----------|
| P030 | Male   | 61 | TB | 2743 | 2.53 | 7.63  | /        | Negative | /        |
| P031 | Male   | 61 | TB | 952  | 0.88 | 0.52  | Postive  | Postive  | /        |
| P032 | Male   | 66 | TB | 1018 | 0.94 | 0.78  | /        | Negative | /        |
| P033 | Male   | 46 | TB | 3174 | 2.93 | 9.34  | Negative | Negative | /        |
| P034 | Male   | 65 | TB | 1503 | 1.39 | 2.71  | Negative | /        | /        |
| P035 | Male   | 80 | TB | 959  | 0.88 | 0.55  | Postive  | Postive  | /        |
| P036 | Female | 60 | TB | 801  | 0.74 | 0.00  | /        | Postive  | /        |
| P037 | Male   | 71 | TB | 7620 | 7.03 | 27.01 | Postive  | Postive  | Negative |
| P038 | Male   | 47 | TB | 1431 | 1.32 | 2.42  | Postive  | /        | /        |
| P039 | Male   | 68 | TB | 1407 | 1.30 | 2.32  | Postive  | Negative | /        |
| P040 | Female | 62 | TB | 4524 | 4.17 | 14.71 | /        | /        | Negative |
| P041 | Male   | 43 | TB | 677  | 0.62 | 0.00  | /        | /        | Postive  |
| P042 | Male   | 68 | TB | 1067 | 0.98 | 0.98  | Postive  | Negative | /        |
| P043 | Male   | 16 | TB | 971  | 0.90 | 0.59  | Postive  | /        | /        |
| P044 | Male   | 53 | TB | 753  | 0.70 | 0.00  | Postive  | /        | Negative |
| P045 | Male   | 47 | TB | 830  | 0.77 | 0.03  | /        | Negative | /        |
| P046 | Male   | 29 | TB | 982  | 0.91 | 0.64  | Negative | Negative | /        |
| P047 | Female | 56 | TB | 1205 | 1.11 | 1.52  | Postive  | Postive  | /        |
| P048 | Male   | 33 | TB | 1365 | 1.26 | 2.16  | Postive  | Postive  | Postive  |
| P049 | Male   | 64 | TB | 2887 | 2.66 | 8.21  | /        | /        | Negative |
| P050 | Male   | 71 | TB | 4083 | 3.77 | 12.96 | Postive  | Negative | Negative |

| <b>LAM<br/>(pg/ml)</b> | <b>LAM<br/>test<br/>(RLUs)</b> |
|------------------------|--------------------------------|
| 0                      | 698                            |
| 1                      | 1073                           |
| 10                     | 3476                           |
| 100                    | 25978                          |
