# Supplementary material for: Improving the diagnosis of active tuberculosis: a novel approach using magnetic particle-based chemiluminescence LAM assay
Source: Springer Nature journal article supplement (doi:10.1186/s12890-024-02893-2), 2024-02-27
Supplement: MOESM2 [file 26791082]

Table S2: Sample Information for Confirming the Performance of LAM

This table provides sample information for confirming the performance of the LAM-CLIA assay, including the number of patients, their sex, age, and LAM test results. The LAM test results indicate the LAM-CLIA assay results for each patient sample, with positive or negative results confirmed by other diagnostic methods.

| sample | Sex    | Age | Clinical diagnosis | LAM test (RLUs) | LAM test(S/CO) | LAM test(pg/ml) | Gene Xpert MTB/RIF | sputum smear | sputum culture |
|--------|--------|-----|--------------------|-----------------|----------------|-----------------|--------------------|--------------|----------------|
| H066   | Female | 38  | Healthy            | 865             | 0.80           | 0.17            | /                  | /            | /              |
| H067   | Female | 50  | Healthy            | 700             | 0.65           | 0.00            | /                  | /            | /              |
| H068   | Male   | 44  | Healthy            | 842             | 0.78           | 0.08            | /                  | /            | /              |
| H069   | Male   | 25  | Healthy            | 546             | 0.50           | 0.00            | /                  | /            | /              |
| H070   | Male   | 45  | Healthy            | 758             | 0.70           | 0.00            | /                  | /            | /              |
| H071   | Female | 34  | Healthy            | 777             | 0.72           | 0.00            | /                  | /            | /              |
| H072   | Male   | 36  | Healthy            | 886             | 0.82           | 0.26            | /                  | /            | /              |
| H073   | Male   | 63  | Healthy            | 665             | 0.61           | 0.00            | /                  | /            | /              |
| H074   | Male   | 28  | Healthy            | 706             | 0.65           | 0.00            | /                  | /            | /              |
| H075   | Male   | 38  | Healthy            | 818             | 0.76           | 0.00            | /                  | /            | /              |
| H076   | Male   | 64  | Healthy            | 709             | 0.65           | 0.00            | /                  | /            | /              |
| H077   | Male   | 34  | Healthy            | 814             | 0.75           | 0.00            | /                  | /            | /              |
| H078   | Male   | 44  | Healthy            | 600             | 0.55           | 0.00            | /                  | /            | /              |
| H079   | Male   | 27  | Healthy            | 633             | 0.58           | 0.00            | /                  | /            | /              |
| H080   | Female | 52  | Healthy            | 620             | 0.57           | 0.00            | /                  | /            | /              |
| H081   | Female | 38  | Healthy            | 860             | 0.79           | 0.15            | /                  | /            | /              |
| H082   | Female | 60  | Healthy            | 700             | 0.65           | 0.00            | /                  | /            | /              |
| H083   | Male   | 33  | Healthy            | 658             | 0.61           | 0.00            | /                  | /            | /              |
| H084   | Male   | 28  | Healthy            | 724             | 0.67           | 0.00            | /                  | /            | /              |
| H085   | Male   | 27  | Healthy            | 614             | 0.57           | 0.00            | /                  | /            | /              |
| H086   | Male   | 47  | Healthy            | 680             | 0.63           | 0.00            | /                  | /            | /              |
| H087   | Male   | 58  | Healthy            | 663             | 0.61           | 0.00            | /                  | /            | /              |
| H088   | Male   | 41  | Healthy            | 727             | 0.67           | 0.00            | /                  | /            | /              |
| H089   | Female | 60  | Healthy            | 678             | 0.63           | 0.00            | /                  | /            | /              |
| H090   | Female | 46  | Healthy            | 697             | 0.64           | 0.00            | /                  | /            | /              |
| H091   | Female | 55  | Healthy            | 745             | 0.69           | 0.00            | /                  | /            | /              |
| H092   | Female | 36  | Healthy            | 674             | 0.62           | 0.00            | /                  | /            | /              |
| H093   | Female | 58  | Healthy            | 689             | 0.64           | 0.00            | /                  | /            | /              |
| H094   | Female | 10  | Healthy            | 647             | 0.60           | 0.00            | /                  | /            | /              |
| H095   | Female | 33  | Healthy            | 713             | 0.66           | 0.00            | /                  | /            | /              |
| H096   | Female | 26  | Healthy            | 745             | 0.69           | 0.00            | /                  | /            | /              |
| H097   | Female | 32  | Healthy            | 682             | 0.63           | 0.00            | /                  | /            | /              |
| H098   | Female | 25  | Healthy            | 743             | 0.68           | 0.00            | /                  | /            | /              |
| H099   | Female | 52  | Healthy            | 864             | 0.80           | 0.17            | /                  | /            | /              |
| H100   | Female | 37  | Healthy            | 740             | 0.68           | 0.00            | /                  | /            | /              |
| H101   | Male   | 27  | Healthy            | 944             | 0.87           | 0.49            | /                  | /            | /              |
| H102   | Male   | 25  | Healthy            | 680             | 0.63           | 0.00            | /                  | /            | /              |

|      |        |    |         |      |      |      |   |   |   |
|------|--------|----|---------|------|------|------|---|---|---|
| H103 | Male   | 32 | Healthy | 629  | 0.58 | 0.00 | / | / | / |
| H104 | Male   | 42 | Healthy | 709  | 0.65 | 0.00 | / | / | / |
| H105 | Male   | 31 | Healthy | 702  | 0.65 | 0.00 | / | / | / |
| H106 | Male   | 30 | Healthy | 743  | 0.69 | 0.00 | / | / | / |
| H107 | Male   | 28 | Healthy | 767  | 0.71 | 0.00 | / | / | / |
| H108 | Male   | 26 | Healthy | 785  | 0.72 | 0.00 | / | / | / |
| H109 | Male   | 32 | Healthy | 801  | 0.74 | 0.00 | / | / | / |
| H110 | Female | 34 | Healthy | 615  | 0.57 | 0.00 | / | / | / |
| H111 | Female | 41 | Healthy | 686  | 0.63 | 0.00 | / | / | / |
| H112 | Female | 65 | Healthy | 718  | 0.66 | 0.00 | / | / | / |
| H113 | Female | 37 | Healthy | 658  | 0.61 | 0.00 | / | / | / |
| H114 | Female | 36 | Healthy | 961  | 0.89 | 0.55 | / | / | / |
| H115 | Female | 38 | Healthy | 691  | 0.64 | 0.00 | / | / | / |
| H116 | Female | 16 | Healthy | 716  | 0.66 | 0.00 | / | / | / |
| H117 | Female | 40 | Healthy | 722  | 0.67 | 0.00 | / | / | / |
| H118 | Male   | 34 | Healthy | 713  | 0.66 | 0.00 | / | / | / |
| H119 | Female | 37 | Healthy | 886  | 0.82 | 0.26 | / | / | / |
| H120 | Female | 34 | Healthy | 684  | 0.63 | 0.00 | / | / | / |
| H121 | Female | 62 | Healthy | 735  | 0.68 | 0.00 | / | / | / |
| H122 | Male   | 34 | Healthy | 768  | 0.71 | 0.00 | / | / | / |
| H123 | Male   | 29 | Healthy | 733  | 0.68 | 0.00 | / | / | / |
| H124 | Male   | 37 | Healthy | 644  | 0.59 | 0.00 | / | / | / |
| H125 | Male   | 32 | Healthy | 728  | 0.67 | 0.00 | / | / | / |
| H126 | Male   | 15 | Healthy | 742  | 0.68 | 0.00 | / | / | / |
| H127 | Male   | 32 | Healthy | 758  | 0.70 | 0.00 | / | / | / |
| H128 | Male   | 29 | Healthy | 979  | 0.90 | 0.63 | / | / | / |
| H129 | Male   | 36 | Healthy | 723  | 0.67 | 0.00 | / | / | / |
| H130 | Female | 26 | Healthy | 767  | 0.71 | 0.00 | / | / | / |
| H131 | Female | 28 | Healthy | 834  | 0.77 | 0.05 | / | / | / |
| H132 | Female | 32 | Healthy | 810  | 0.75 | 0.00 | / | / | / |
| H133 | Female | 25 | Healthy | 696  | 0.64 | 0.00 | / | / | / |
| H134 | Male   | 28 | Healthy | 1041 | 0.96 | 0.87 | / | / | / |
| H135 | Male   | 35 | Healthy | 647  | 0.60 | 0.00 | / | / | / |
| H136 | Male   | 33 | Healthy | 827  | 0.76 | 0.02 | / | / | / |
| H137 | Male   | 27 | Healthy | 947  | 0.87 | 0.50 | / | / | / |
| H138 | Male   | 27 | Healthy | 920  | 0.85 | 0.39 | / | / | / |
| H139 | Male   | 64 | Healthy | 768  | 0.71 | 0.00 | / | / | / |
| H140 | Female | 26 | Healthy | 672  | 0.62 | 0.00 | / | / | / |
| H141 | Female | 61 | Healthy | 853  | 0.79 | 0.12 | / | / | / |
| H142 | Female | 25 | Healthy | 752  | 0.69 | 0.00 | / | / | / |
| H143 | Female | 42 | Healthy | 835  | 0.77 | 0.05 | / | / | / |
| H144 | Male   | 27 | Healthy | 650  | 0.60 | 0.00 | / | / | / |
| H145 | Female | 27 | Healthy | 658  | 0.61 | 0.00 | / | / | / |
| H146 | Female | 67 | Healthy | 956  | 0.88 | 0.53 | / | / | / |
| H147 | Male   | 48 | Healthy | 670  | 0.62 | 0.00 | / | / | / |
| H148 | Female | 39 | Healthy | 649  | 0.60 | 0.00 | / | / | / |
| H149 | Male   | 68 | Healthy | 745  | 0.69 | 0.00 | / | / | / |
| H150 | Female | 35 | Healthy | 734  | 0.68 | 0.00 | / | / | / |
| H151 | Female | 64 | Healthy | 705  | 0.65 | 0.00 | / | / | / |

|      |        |    |         |         |         |         |          |          |          |
|------|--------|----|---------|---------|---------|---------|----------|----------|----------|
| H152 | Female | 38 | Healthy | 820     | 0.76    | 0.00    | /        | /        | /        |
| H153 | Female | 26 | Healthy | 829     | 0.77    | 0.03    | /        | /        | /        |
| H154 | Female | 20 | Healthy | 823     | 0.76    | 0.00    | /        | /        | /        |
| H155 | Female | 24 | Healthy | 837     | 0.77    | 0.06    | /        | /        | /        |
| H156 | Male   | 24 | Healthy | 653     | 0.60    | 0.00    | /        | /        | /        |
| H157 | Female | 25 | Healthy | 722     | 0.67    | 0.00    | /        | /        | /        |
| H158 | Female | 41 | Healthy | 623     | 0.57    | 0.00    | /        | /        | /        |
| H159 | Female | 22 | Healthy | 707     | 0.65    | 0.00    | /        | /        | /        |
| H160 | Female | 24 | Healthy | 694     | 0.64    | 0.00    | /        | /        | /        |
| H161 | Male   | 59 | Healthy | 812     | 0.75    | 0.00    | /        | /        | /        |
| H162 | Male   | 38 | Healthy | 1027    | 0.95    | 0.81    | /        | /        | /        |
| H163 | Female | 25 | Healthy | 676     | 0.62    | 0.00    | /        | /        | /        |
| H164 | Female | 29 | Healthy | 885     | 0.82    | 0.25    | /        | /        | /        |
| H165 | Female | 24 | Healthy | 1050    | 0.97    | 0.91    | /        | /        | /        |
| H166 | Female | 36 | Healthy | 852     | 0.79    | 0.12    | /        | /        | /        |
| H167 | Female | 29 | Healthy | 842     | 0.78    | 0.08    | /        | /        | /        |
| H168 | Female | 22 | Healthy | 792     | 0.73    | 0.00    | /        | /        | /        |
| H169 | Male   | 28 | Healthy | 1012    | 0.93    | 0.76    | /        | /        | /        |
| L001 | Male   | 51 | LTBI    | 601     | 0.55    | 0.00    | /        | /        | /        |
| L002 | Female | 41 | LTBI    | 901     | 0.83    | 0.32    | /        | /        | /        |
| L003 | Male   | 40 | LTBI    | 602     | 0.55    | 0.00    | /        | /        | /        |
| L004 | Female | 52 | LTBI    | 904     | 0.83    | 0.33    | /        | /        | /        |
| L005 | Female | 33 | LTBI    | 877     | 0.81    | 0.22    | /        | /        | /        |
| L006 | Female | 42 | LTBI    | 1073    | 0.99    | 1.00    | /        | /        | /        |
| L007 | Female | 54 | LTBI    | 828     | 0.76    | 0.02    | /        | /        | /        |
| L008 | Male   | 51 | LTBI    | 745     | 0.69    | 0.00    | /        | /        | /        |
| L009 | Male   | 55 | LTBI    | 817     | 0.75    | 0.00    | /        | /        | /        |
| L010 | Female | 55 | LTBI    | 822     | 0.76    | 0.00    | /        | /        | /        |
| L011 | Female | 43 | LTBI    | 609     | 0.56    | 0.00    | /        | /        | /        |
| L012 | Female | 42 | LTBI    | 765     | 0.71    | 0.00    | /        | /        | /        |
| L013 | Female | 28 | LTBI    | 704     | 0.65    | 0.00    | /        | /        | /        |
| L014 | Female | 38 | LTBI    | 683     | 0.63    | 0.00    | /        | /        | /        |
| L015 | Female | 27 | LTBI    | 687     | 0.63    | 0.00    | /        | /        | /        |
| L016 | Female | 36 | LTBI    | 937     | 0.86    | 0.46    | /        | /        | /        |
| L017 | Female | 41 | LTBI    | 922     | 0.85    | 0.40    | /        | /        | /        |
| L018 | Female | 39 | LTBI    | 953     | 0.88    | 0.52    | /        | /        | /        |
| L019 | Female | 25 | LTBI    | 810     | 0.75    | 0.00    | /        | /        | /        |
| P051 | Male   | 6  | TB      | 1074    | 0.99    | 1.00    | Postive  | Negative | Negative |
| P052 | Male   | 10 | TB      | 4692    | 4.33    | 15.38   | Negative | Negative | /        |
| P053 | Female | 12 | TB      | 1846796 | 1703.69 | 7334.02 | Postive  | Postive  | /        |
| P054 | Male   | 12 | TB      | 1139    | 1.05    | 1.26    | Negative | Negative | /        |
| P055 | Female | 13 | TB      | 811     | 0.75    | 0.00    | Negative | Postive  | Negative |
| P056 | Female | 14 | TB      | 690     | 0.64    | 0.00    | Postive  | Negative | Negative |
| P057 | Male   | 14 | TB      | 3997    | 3.69    | 12.62   | Postive  | Negative | /        |
| P058 | Female | 14 | TB      | 4704    | 4.34    | 15.42   | /        | Negative | /        |
| P059 | Male   | 14 | TB      | 7206    | 6.65    | 25.37   | Postive  | Negative | /        |
| P060 | Male   | 14 | TB      | 859     | 0.79    | 0.15    | Postive  | Negative | Negative |
| P061 | Male   | 14 | TB      | 959     | 0.89    | 0.55    | Negative | Negative | /        |
| P062 | Male   | 15 | TB      | 1220    | 1.13    | 1.58    | Negative | /        | /        |

|      |        |    |    |        |        |         |          |          |          |
|------|--------|----|----|--------|--------|---------|----------|----------|----------|
| P063 | Male   | 18 | TB | 674    | 0.62   | 0.00    | /        | /        | /        |
| P064 | Male   | 19 | TB | 986    | 0.91   | 0.65    | Negative | Postive  | Negative |
| P065 | Female | 23 | TB | 623    | 0.57   | 0.00    | Negative | /        | Negative |
| P066 | Male   | 23 | TB | 2273   | 2.10   | 5.77    | Postive  | Postive  | Postive  |
| P067 | Male   | 24 | TB | 675    | 0.62   | 0.00    | Negative | Postive  | /        |
| P068 | Female | 24 | TB | 2121   | 1.96   | 5.16    | Postive  | Negative | /        |
| P069 | Male   | 25 | TB | 3020   | 2.79   | 8.74    | /        | /        | /        |
| P070 | Male   | 26 | TB | 921    | 0.85   | 0.39    | Negative | Negative | Postive  |
| P071 | Female | 28 | TB | 762    | 0.70   | 0.00    | Postive  | Negative | /        |
| P072 | Male   | 28 | TB | 929    | 0.86   | 0.42    | Negative | Postive  | Postive  |
| P073 | Female | 30 | TB | 744    | 0.69   | 0.00    | /        | Negative | /        |
| P074 | Female | 30 | TB | 9369   | 8.64   | 33.96   | /        | Negative | /        |
| P075 | Female | 32 | TB | 929    | 0.86   | 0.43    | Negative | /        | Negative |
| P076 | Female | 33 | TB | 887    | 0.82   | 0.26    | Postive  | /        | Negative |
| P077 | Male   | 33 | TB | 10505  | 9.69   | 38.47   | Negative | Negative | /        |
| P078 | Female | 37 | TB | 1030   | 0.95   | 0.83    | Negative | /        | /        |
| P079 | Female | 39 | TB | 741    | 0.68   | 0.00    | Postive  | /        | Negative |
| P080 | Female | 39 | TB | 1604   | 1.48   | 3.11    | /        | Negative | /        |
| P081 | Male   | 40 | TB | 886    | 0.82   | 0.25    | Negative | Negative | /        |
| P082 | Male   | 43 | TB | 547559 | 505.13 | 2172.18 | Postive  | Postive  | Negative |
| P083 | Male   | 44 | TB | 806    | 0.74   | 0.00    | Negative | Postive  | /        |
| P084 | Male   | 46 | TB | 1446   | 1.33   | 2.48    | Postive  | Postive  | /        |
| P085 | Female | 46 | TB | 1600   | 1.48   | 3.09    | Postive  | Postive  | /        |
| P086 | Male   | 49 | TB | 681    | 0.63   | 0.00    | Postive  | Postive  | /        |
| P087 | Female | 49 | TB | 1690   | 1.56   | 3.45    | /        | /        | Negative |
| P088 | Male   | 49 | TB | 5830   | 5.38   | 19.90   | Negative | /        | /        |
| P089 | Female | 53 | TB | 739    | 0.68   | 0.00    | Postive  | Negative | Postive  |
| P090 | Male   | 53 | TB | 1302   | 1.20   | 1.91    | Postive  | /        | /        |
| P091 | Male   | 54 | TB | 968    | 0.89   | 0.58    | Negative | /        | /        |
| P092 | Male   | 54 | TB | 1220   | 1.13   | 1.58    | Postive  | Postive  | Negative |
| P093 | Male   | 54 | TB | 2371   | 2.19   | 6.15    | Postive  | Postive  | /        |
| P094 | Female | 56 | TB | 814    | 0.75   | 0.00    | /        | Negative | /        |
| P095 | Male   | 56 | TB | 1473   | 1.36   | 2.59    | Postive  | Postive  | /        |
| P096 | Female | 58 | TB | 757    | 0.70   | 0.00    | /        | Negative | /        |
| P097 | Female | 58 | TB | 851    | 0.78   | 0.11    | Negative | Negative | /        |
| P098 | Male   | 59 | TB | 1849   | 1.71   | 4.08    | Negative | /        | /        |
| P099 | Female | 61 | TB | 7463   | 6.88   | 26.39   | Postive  | Postive  | /        |
| P100 | Male   | 62 | TB | 963    | 0.89   | 0.56    | /        | Postive  | /        |
| P101 | Male   | 63 | TB | 1103   | 1.02   | 1.12    | Postive  | Negative | Negative |
| P102 | Female | 21 | TB | 1342   | 1.24   | 2.07    | Postive  | /        | /        |
| P103 | Female | 64 | TB | 771    | 0.71   | 0.00    | Postive  | Negative | /        |
| P104 | Female | 66 | TB | 1140   | 1.05   | 1.26    | /        | /        | /        |
| P105 | Male   | 67 | TB | 974    | 0.90   | 0.61    | /        | /        | Postive  |
| P106 | Male   | 69 | TB | 11284  | 10.41  | 41.57   | Postive  | Negative | /        |
| P107 | Male   | 70 | TB | 912    | 0.84   | 0.36    | Postive  | /        | /        |
| P108 | Female | 70 | TB | 1034   | 0.95   | 0.84    | Postive  | /        | /        |
| P109 | Male   | 70 | TB | 2933   | 2.71   | 8.39    | /        | /        | /        |
| P110 | Male   | 70 | TB | 699    | 0.64   | 0.00    | Negative | Negative | /        |
| P111 | Male   | 71 | TB | 764    | 0.70   | 0.00    | Postive  | Postive  | /        |

|      |        |    |                  |        |        |         |          |          |          |
|------|--------|----|------------------|--------|--------|---------|----------|----------|----------|
| P112 | Male   | 71 | TB               | 1007   | 0.93   | 0.74    | Postive  | Postive  | Postive  |
| P113 | Male   | 71 | TB               | 4580   | 4.23   | 14.93   | /        | /        | /        |
| P114 | Female | 74 | TB               | 1039   | 0.96   | 0.86    | Postive  | Negative | /        |
| P115 | Female | 74 | TB               | 753    | 0.70   | 0.00    | /        | Postive  | /        |
| P116 | Male   | 75 | TB               | 2309   | 2.13   | 5.91    | Postive  | /        | /        |
| P117 | Male   | 75 | TB               | 516895 | 476.84 | 2050.35 | Postive  | /        | /        |
| P118 | Male   | 76 | TB               | 9435   | 8.70   | 34.22   | Postive  | Postive  | /        |
| P119 | Male   | 77 | TB               | 738    | 0.68   | 0.00    | /        | /        | Postive  |
| P120 | Female | 39 | TB               | 4864   | 4.49   | 16.06   | Negative | /        | Postive  |
| P121 | Male   | 79 | TB               | 1244   | 1.15   | 1.68    | Negative | /        | Postive  |
| P122 | Male   | 80 | TB               | 49884  | 46.02  | 194.93  | Negative | Negative | /        |
| P123 | Male   | 82 | TB               | 9665   | 8.92   | 35.13   | Negative | Postive  | /        |
| P124 | Male   | 88 | TB               | 3094   | 2.85   | 9.03    | /        | /        | Negative |
| P125 | Female | 88 | TB               | 3103   | 2.86   | 9.06    | Postive  | /        | Negative |
| P126 | Male   | 89 | TB               | 828    | 0.76   | 0.03    | Postive  | Negative | /        |
| P127 | Male   | 12 | Hematoge<br>nous | 4266   | 3.94   | 13.68   | Postive  | /        | Negative |
| P128 | Male   | 53 | Hematoge<br>nous | 11460  | 10.57  | 42.27   | /        | Postive  | /        |
| P129 | Male   | 53 | Hematoge<br>nous | 27268  | 25.16  | 105.07  | Postive  | /        | Negative |
| P130 | Male   | 67 | Hematoge<br>nous | 6414   | 5.92   | 22.22   | Postive  | /        | Negative |
| P131 | Male   | 52 | Hematoge<br>nous | 3586   | 3.31   | 10.98   | Postive  | /        | /        |
| P132 | Male   | 63 | Hematoge<br>nous | 4402   | 4.06   | 14.23   | Postive  | Postive  | Postive  |
| P133 | Male   | 78 | Hematoge<br>nous | 34512  | 31.84  | 133.85  | Postive  | Postive  | Postive  |
| P134 | Female | 63 | Hematoge<br>nous | 48254  | 44.52  | 188.45  | Postive  | Postive  | Postive  |
| P135 | Male   | 58 | Hematoge<br>nous | 986    | 0.91   | 0.65    | Postive  | /        | /        |
| P136 | Female | 18 | Hematoge<br>nous | 998    | 0.92   | 0.70    | Postive  | /        | Negative |
| P137 | Male   | 45 | Hematoge<br>nous | 94653  | 87.32  | 372.79  | /        | /        | Postive  |

---

| CLIA<br>LAM assay | Clinical diagnosis |              | Total |
|-------------------|--------------------|--------------|-------|
|                   | Positive (+)       | Negative (-) |       |
| Positive (+)      | 48                 | 0            | 48    |
| Negative (-)      | 39                 | 104          | 143   |
| Total             | 87                 | 104          | 191   |

---
